# Supplementary material for: Efficacy of Autologous Platelet-Rich Plasma in Ovarian Stimulation and In Vitro Fertilization: Impact of Obesity on Reproductive Outcomes
Source: Research Square preprint supplement (doi:10.21203/rs.3.rs-7586051/v1), 2025-11-11
Supplement: Supplementary file 1 [file bc3f80e16830fe54001a90e2.docx]

Journal name: Archives of Gynecology and Obstetrics

**Efficacy of Autologous Platelet-Rich Plasma in Ovarian Stimulation and In Vitro Fertilization: Impact of Obesity on Reproductive Outcomes**

Dinorah Hernández-Melchor1,2, Juan José Suárez1, Leonardo M. Porchia1, Abril Romero-Jarillo2, Ginna Ortiz1, Iván Madrazo1, Felipe Camargo1, and Esther López-Bayghen3,***.

1 Investigación Clínica, Instituto de Infertilidad y Genética México SC, Ingenes, México City, México.

2 Instituto Regenera SC, México City, México

3 Departamento de Toxicología, Centro de Investigación y de Estudios Avanzados del Instituto Politécnico Nacional (Cinvestav-IPN), México City, México.

** Corresponding author:* E-mail: [ebayghen@cinvestav.mx](mailto:ebayghen@cinvestav.mx) (ELB)

**Supplement Table 1. Criteria for complication severity.**

|  | **Mild** | **Moderate** | **Severe** |
| --- | --- | --- | --- |
| **Bleeding volume after ovarian application** | Minimal  5-15 ml | Moderate  50-100 ml | Abundant  <500 ml |
| **Handling** | Drawn in the OR before moving to the recovery room | Drawn in the OR before moving to the recovery room.  Patient in observation 2 hours before discharge | Drawn in the OR before moving to the recovery room.  Hemoperitoneum requiring culdocentesis  60-90 min after PPR injection |
| **Symptoms** | No pain after PRP application | No pain after PRP application. | Abdominal pain and pain radiating to the shoulder >5/10 on the VAS scale in the recovery room |
| **Follow up** | No further complications | No further complications | Conservative management, self-limiting bleeding,  no further complications |
| **Incidence** | 58.02% (159/274) | 15.6% (43/274) | 4.63% (12/274) |

Abbreviations: OR, Operating room; PRP, Platelet-rich plasma; VAS, visual analog scale.
